# Supplementary material for: Torg-Pavlov ratio qualification to diagnose developmental cervical spinal stenosis based on HRViT neural network
Source: Research Square preprint supplement (doi:10.21203/rs.3.rs-5195642/v1), 2025-04-15
Supplement: Supplementary file 1 [file 5dbc1050a31d57e91649c122.docx]

Table 1. a: Characteristics of subjects in the training and test sets.

| Characteristic | Training set | Test set |
| --- | --- | --- |
| number | 1466 | 157 |
| age(year)* | 41.54 + 12.79 | 41.89+12.41 |
| sex |  |  |
| male | 833(56.8%) | 101(64.3%) |
| female | 633(43.2%) | 56(35.7%) |

b: Subgroup analysis results of test sets

| Subgroup | MAE (TPR) | ICC (95% CI) |
| --- | --- | --- |
| Age 18–40  Age 61–80 | 0.02  0.03 | 0.85 (0.79–0.90)  0.82 (0.75–0.88) |
| Male | 0.01 | 0.88 (0.83–0.92) |
| Female | 0.02 | 0.86 (0.81–0.90) |

* Data were expressed as mean ± SD. ICC (95% CI): intra-class correlation coefficient (95% confidence interval), MAEs and RMSEs were expressed as the means ± SD

Table 2.The distribution of SDD (mm), VBD (mm), and TPR in the dataset.

|  | number | VBD | SDD | TPR | The lower 90% limit of TPR |
| --- | --- | --- | --- | --- | --- |
| C2 | 1623 | 16.63±1.88 | 21.59±2.24 | 1.31±0.17 | 1.03 |
| C3 | 1623 | 18.52±2.07 | 17.93±1.78 | 0.98±0.13 | 0.76 |
| C4 | 1623 | 18.47±2.17 | 17.60±1.74 | 0.96±0.14 | 0.74 |
| C5 | 1623 | 18.48±4.93 | 18.05±1.73 | 0.99±0.14 | 0.76 |
| C6 | 1623 | 19.03±2.19 | 18.52±1.83 | 0.98±0.13 | 0.77 |
| C7 | 1623 | 19.69±2.19 | 18.12±1.80 | 0.93±0.12 | 0.73 |

Data were expressed as mean ± SD. TPR: Torg-Pavlov ratio

Table 3. Measurement values of the spinal surgeon and model estimation at C2-C7

|  | R1 | Model | t | p |
| --- | --- | --- | --- | --- |
| TPR |  |  |  |  |
| C2 | 1.26±0.18 | 1.24±0.15 | -1.1 | 0.27 |
| C3 | 0.92±0.14 | 0.90±0.14 | 1.21 | 0.23 |
| C4 | 0.90±0.16 | 0.89±0.16 | 1.01 | 0.31 |
| C5 | 0.93±0.16 | 0.92±0.15 | 0.67 | 0.51 |
| C6 | 0.92±0.15 | 0.92±0.15 | 0.05 | 0.96 |
| C7 | 0.89±0.15 | 0.88±0.12 | 0.47 | 0.64 |

Data are expressed as the means ± SDs

P < 0.05 indicates significant difference between the model and reference standard

Table 4.Comparison consistence between the reference standards and the model measurement at C2-C7

| Parameter | ICC(95%CI) | r | MAEs | RMSEs |
| --- | --- | --- | --- | --- |
| The TPR |  |  |  |  |
| C2 | 0.77(0.69-0.83) | 0.78* | 0.02±0.11 | 0.11±0.03 |
| C3 | 0.85(0.79-0.89) | 0.85* | 0.02±0.08 | 0.08±0.02 |
| C4 | 0.89(0.85-0.92) | 0.90* | 0.02±0.07 | 0.07±0.01 |
| C5 | 0.90(0.86-0.92) | 0.90* | 0.01±0.07 | 0.07±0.01 |
| C6 | 0.87(0.83-0.91) | 0.87* | <0.01 | 0.07±0.01 |
| C7 | 0.78(0.71-0.83) | 0.79* | 0.01±0.09 | 0.09±0.02 |

ICC (95% CI): intra-class correlation coefficient (95% confidence interval), r represented Pearson correlation coefficient, SD: standard deviation.* p < 0.05. MAEs and RMSEs were expressed as the means ± SD

Table 5. Alignment of model predictions with surgeon R1 and inter-surgeon agreement

|  | R1-model (MAE) | R1-R2 (MAE) | R1-R3 (MAE) |
| --- | --- | --- | --- |
|  |  |  |  |
| C2 | 0.02±0.11 | 0.20±0.17 | 0.19±0.14 |
| C3 | 0.02±0.08 | 0.16±0.14 | 0.15±0.13 |
| C4 | 0.02±0.07 | 0.17±0.16 | 0.17±0.16 |
| C5 | 0.01±0.07 | 0.17±0.14 | 0.16±0.13 |
| C6 | ＜0.01 | 0.16±0.13 | 0.16±0.13 |
| C7 | 0.01±0.09 | 0.16±0.12 | 0.16±0.13 |
| Mean | 0.01±0.08 | 0.17±0.14 | 0.17±0.14 |
| Accuracy | 84.1% | 57.3% | 56.7% |

MAE were expressed as the mean ± SD. Model was trained exclusively on annotations from surgeon R1; R2 and R3 annotations were used only for testing
